# Supplementary material for: A depth-suitable and water-stable trap for CO2 capture
Source: Royal Society of Chemistry journal article supplement (doi:10.1039/d1ra01268a), 2021-01-01
Supplement: d1ra01268a1.pdf [file d1ra01268a1.pdf]

## Supplementary Information

### A depth-suitable and water-stable trap for CO<sub>2</sub> capture

Zhaofu Zhang,\* Shuaishuai Liu, Jun Ma and Tianbin Wu

\*Corresponding author. Email: zhangzf@iccas.ac.cn

## Experimental

### Materials

Tetraethylammonium chloride (98%), tetramethylammonium chloride (99%), octanoic acid (99%), 1,4-cyclohexanedicarboxylic acid (98%), 1,3,5-benzenetricarboxylic acid (99%) and sodium sulfite (98%) were supplied by Innochem Co., Ltd. Methyltrioctylammonium chloride (99%), dipotassium hydrogen phosphate (99%), tetrabutylammonium bromide (99%) and tripotassium phosphate (99%) were obtained from J&K Co., Ltd. Tributyl-dodecylphosphonium bromide (98%) and 2,2-dimethylbutyric acid (98%) were purchased from Aladdin Co., Ltd. Tributyl-n-octylphosphonium bromide (98%) was got from TCI Co., Ltd. Butyltriethylammonium bromide (97%) and Phenolphthalein (98%) were obtained from Alfa Aesar Co., Ltd. 2-Ethylhexanoic acid (99%) and 2-propylpentanoic acid (99%) were supplied by Acros Co., Ltd. Trimethylbutylammonium chloride (97%) and tributylhexadecylphosphonium bromide (97%) were obtained from Ark Co., Ltd. Tributylhexylphosphonium bromide (99%) was got from Centre for Green Chemistry and Catalysis, LICP, CAS. CO<sub>2</sub> (99.999%), SO<sub>2</sub> (99.9%) and H<sub>2</sub>S (99.9%) were supplied by Beijing Analytical Instrument Factory. Other reagents were all analytical grade and were provided by Sinopharm Chemical Reagent Co., Ltd. All reagents were used as received.

### Carboxylates synthesis and characterization

All carboxylates are synthesized and dried before using following the procedures reported in literatures.<sup>25,29</sup> Representative carboxylate ionic liquid were characterized by <sup>1</sup>H-NMR, ESI-MS and IR. <sup>1</sup>H-NMR were presented in Fig. S3a and Fig. S7. IR were presented in Fig. S8. ESI-MS: tetrabutylammonium 2-ethylhexanoate (+: 242.3, -: 143.2), tributylhexylphosphonium 2-ethylhexanoate (+: 287.3, -: 143.2), tributyl-octylphosphonium 2-ethylhexanoate (+: 315.3, -: 143.2), tributyl-dodecylphosphonium 2-ethylhexanoate (+: 371.4, -: 143.2), methyltrioctylammonium 2-ethylhexanoate (+: 368.4, -: 143.2), tributylhexylphosphonium 2-propylpentanoate (+: 287.3, -: 143.2).

### Absorption study

The phase behavior studies were carried out in glass bottles with magnetic stir. CO<sub>2</sub> (SO<sub>2</sub> or H<sub>2</sub>S) was provided with balloons.

In a typical absorption test, carboxylates and water needed were added in. The bottle was connected with balloon, and kept stirring for 12 hrs. The sorption tests at 80 °C were carried out in an oil bath. All CO<sub>2</sub> sorptions are determined by titrating with NaOH solution, phenolphthalein as detector, after replacement of CO<sub>2</sub> in bottle's space with air five times.

In separation of surfactant test, 50 mg tributylhexadecylphosphonium bromide, 16 mg sodium 2-ethylhexanoate and 5 g water were added in a bottle, kept stirring until the solution is clear. CO<sub>2</sub> was injected with a speed about 20 ml/min, and the solution

became completely opaque in three minutes. Then the opaque mixture was exposed to air and kept stirring, and the solution became clear again in several minutes.

### **Sample preparation and characterization**

For sample of sodium carbonate plus 1,4-cyclohexanedicarboxylic acid, 0.106 g sodium carbonate, 0.172 g 1,4-cyclohexanedicarboxylic acid and 1 ml ethanol were added in bottle, then sealed with cap and kept stirring for 12 hrs. After ethanol in the mixture was brought out with CO<sub>2</sub> flow, the solid left in the bottle was tested with XRD.

For other solids from 1,4-cyclohexanedicarboxylic acid, 1,3,5-benzenetricarboxylic acid react with sodium sulfite, dipotassium hydrogen phosphate and tripotassium phosphate are prepared as follows: 2 mmol carboxylic acid, corresponding weight of salts and 2 ml ethanol were added in bottle and kept stirring for 12 hrs, than ethanol is removed by rotary evaporation.

Powder XRD analysis was performed on the X-ray diffractometer (Model D/MAX2500, Rigaka) with Cu-K $\alpha$  radiation. <sup>1</sup>H NMR analysis was carried out on Bruker Avance III 400 HD NMR spectrometer. The SEM characterizations were carried out using an HITACHI SU-8020. Infrared Radiation (IR) spectroscopy was recorded on Bruker Tensor-27 FT-IR Spectrometer.

All DFT calculations were performed with the Gaussian 09 package,<sup>30</sup> using the B3-LYP functional and 6-31G+(d) basis set.

### **References:**

- 29 Suarez, P. A. Z., Dullius, J. E. L., Einloft, S., de Souza R. F. and J. Dupont, *Polyhedron*, 1996, **15**, 1217–1219 (1996).
- 30 Frisch, M. J. et al. Gaussian 09, Revision A.01, Gaussian, Inc., Wallingford, CT, 2009.

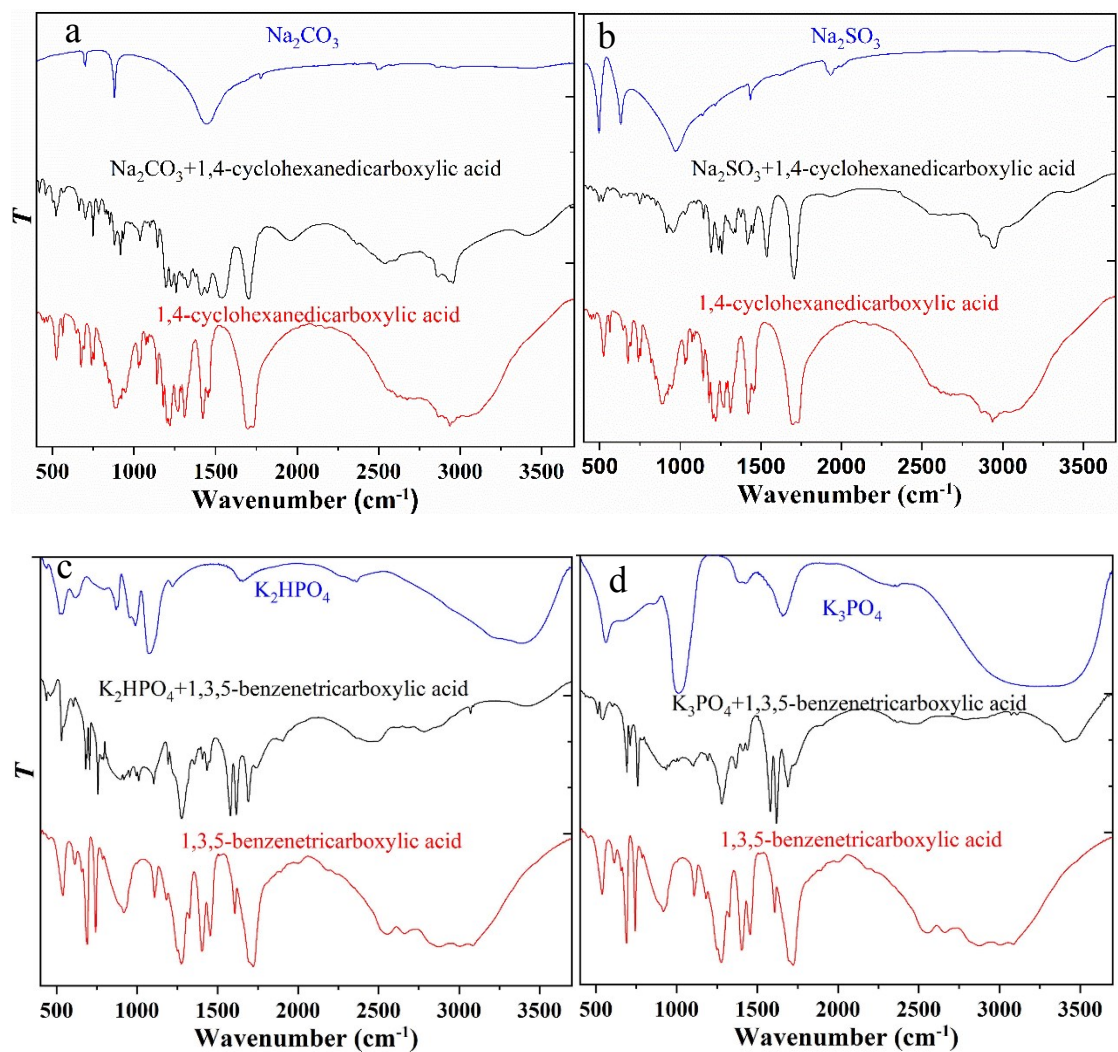

**Fig. S1** IR test of united hydrogen bonds products.

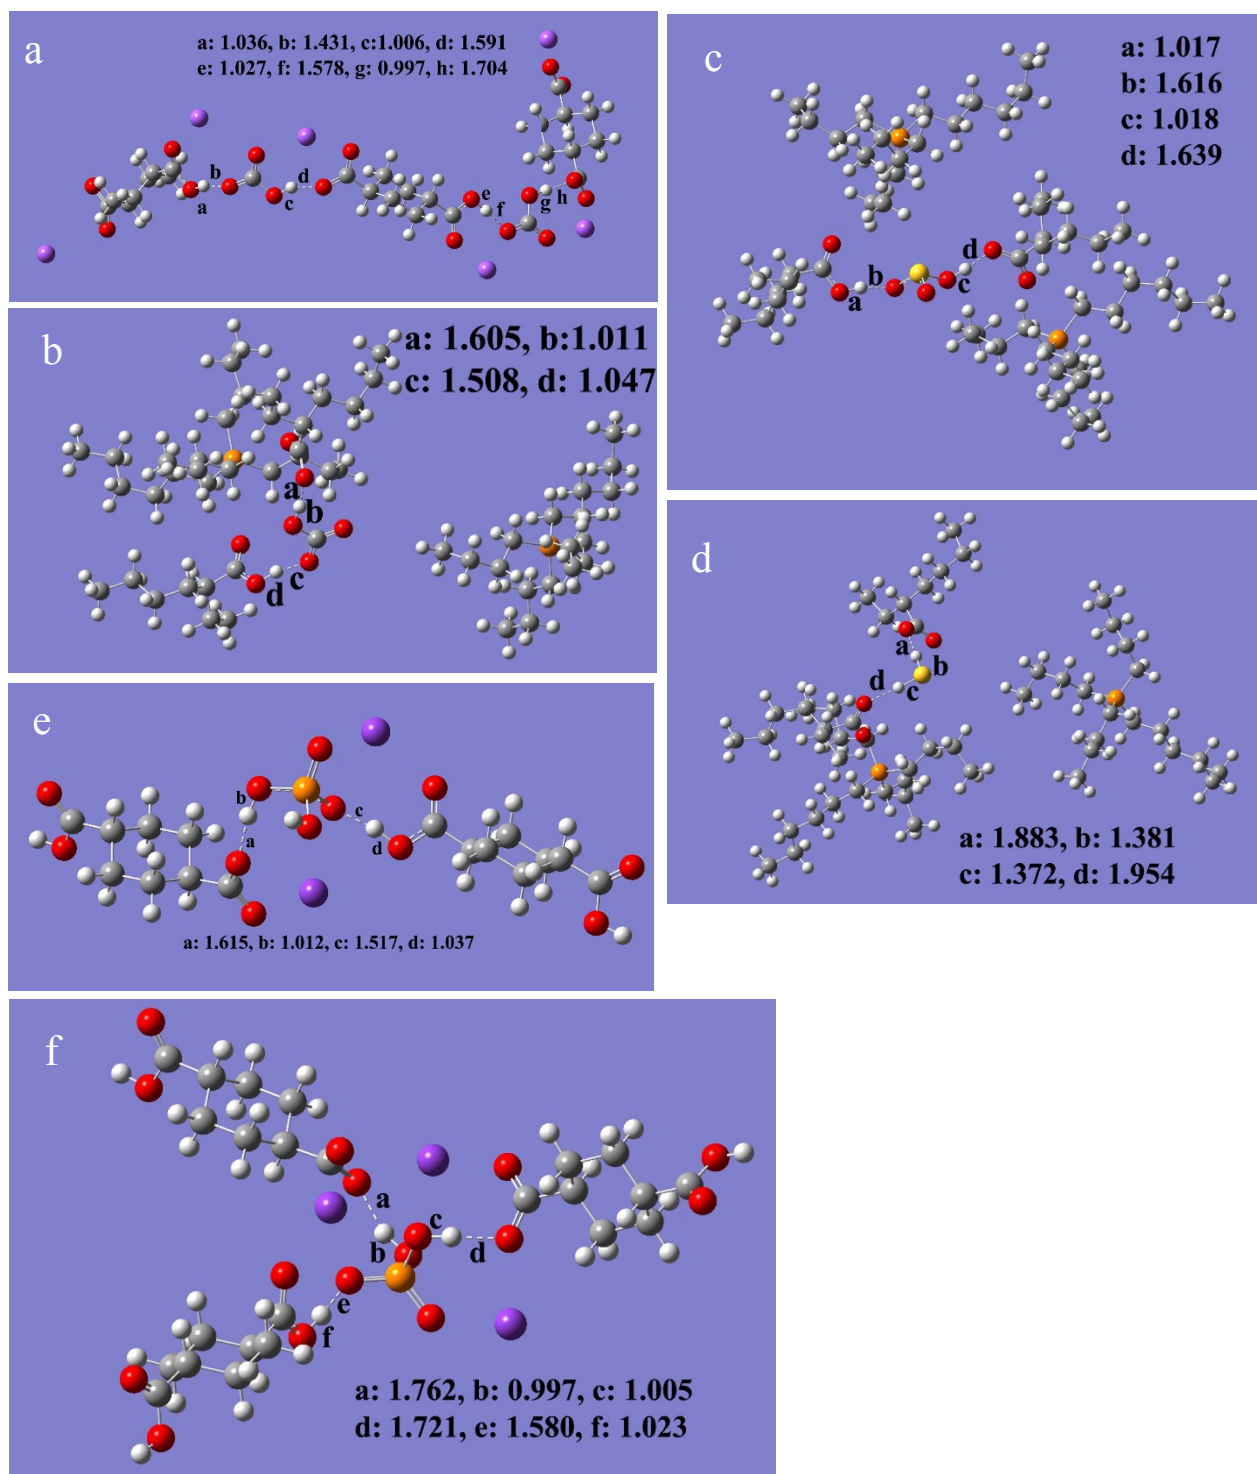

**Fig. S2** Spatial conformation of united hydrogen bonds products. a~g are got from DFT calculation [DFT/B3-LYP, 6-31+G(d)]. **(a)** sodium 1,4-Cyclohexanedicarboxylate + CO<sub>2</sub> + H<sub>2</sub>O; **(b)** Tributylhexylphosphonium 2-ethylhexanoate (**1**) + CO<sub>2</sub> + H<sub>2</sub>O; **(c)** **1** + SO<sub>2</sub> + H<sub>2</sub>O; **(d)** **1** + H<sub>2</sub>S; **(e)** 1,4-Cyclohexanedicarboxylic acid + K<sub>2</sub>HPO<sub>4</sub>; **(f)** 1,4-Cyclohexanedicarboxylic acid + K<sub>3</sub>PO<sub>4</sub>.

a

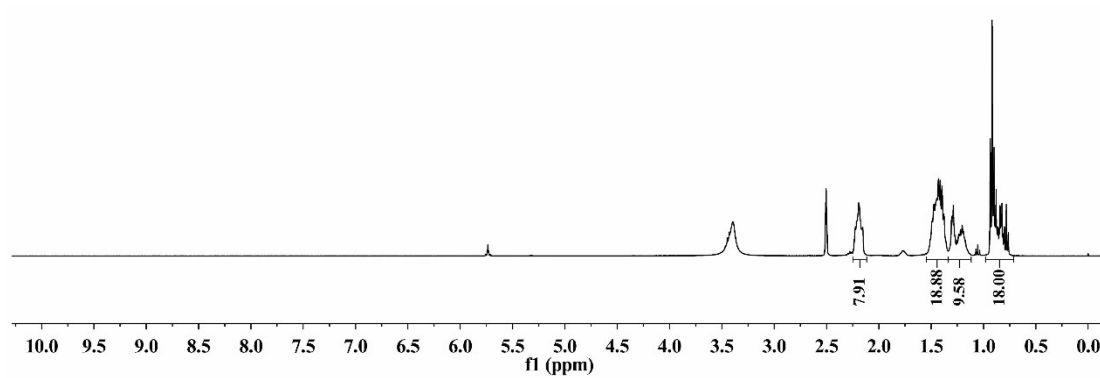

b

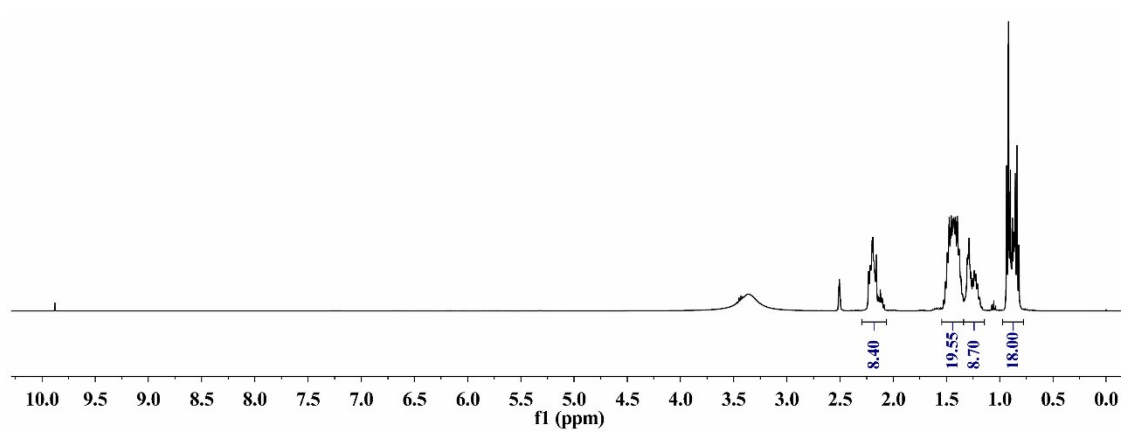

**Fig. S3** <sup>1</sup>H NMR study of carboxylates absorbing SO<sub>2</sub>. a) Tributylhexylphosphonium 2-ethylhexanoate (**1**) In DMSO-d<sub>6</sub>; b) Top phase in **1** + water + SO<sub>2</sub> system in DMSO-d<sub>6</sub>.

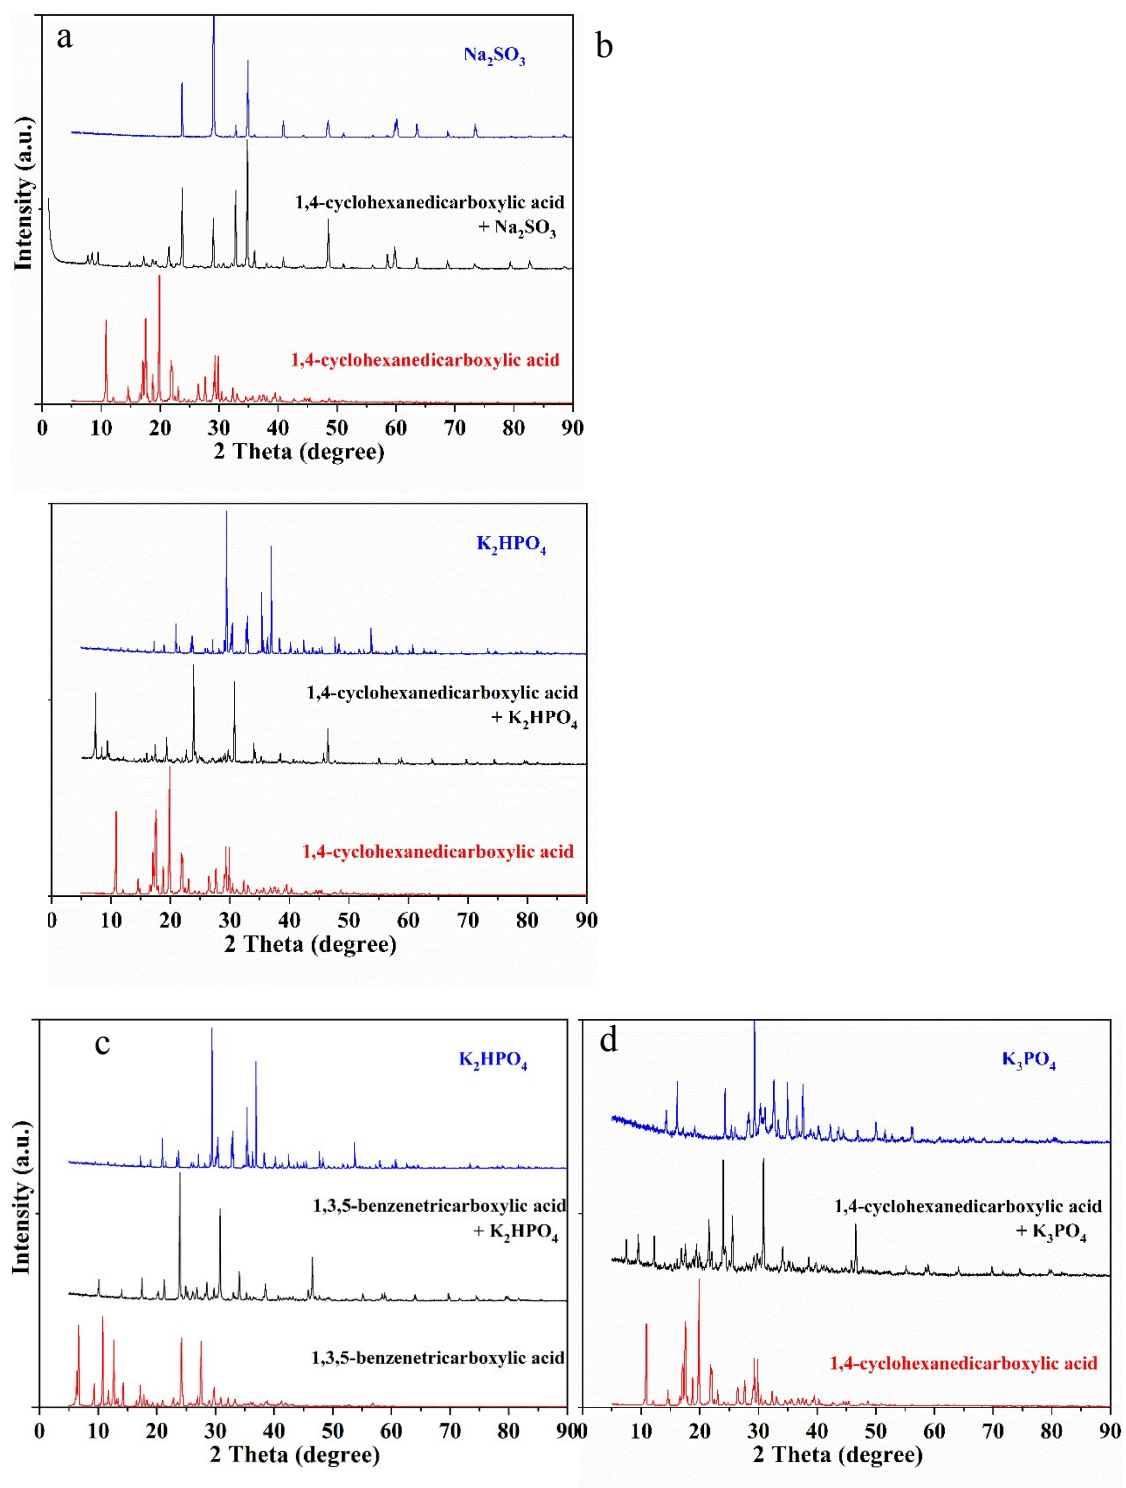

**Fig. S4** Powder XRD patterns of united hydrogen bonds products.



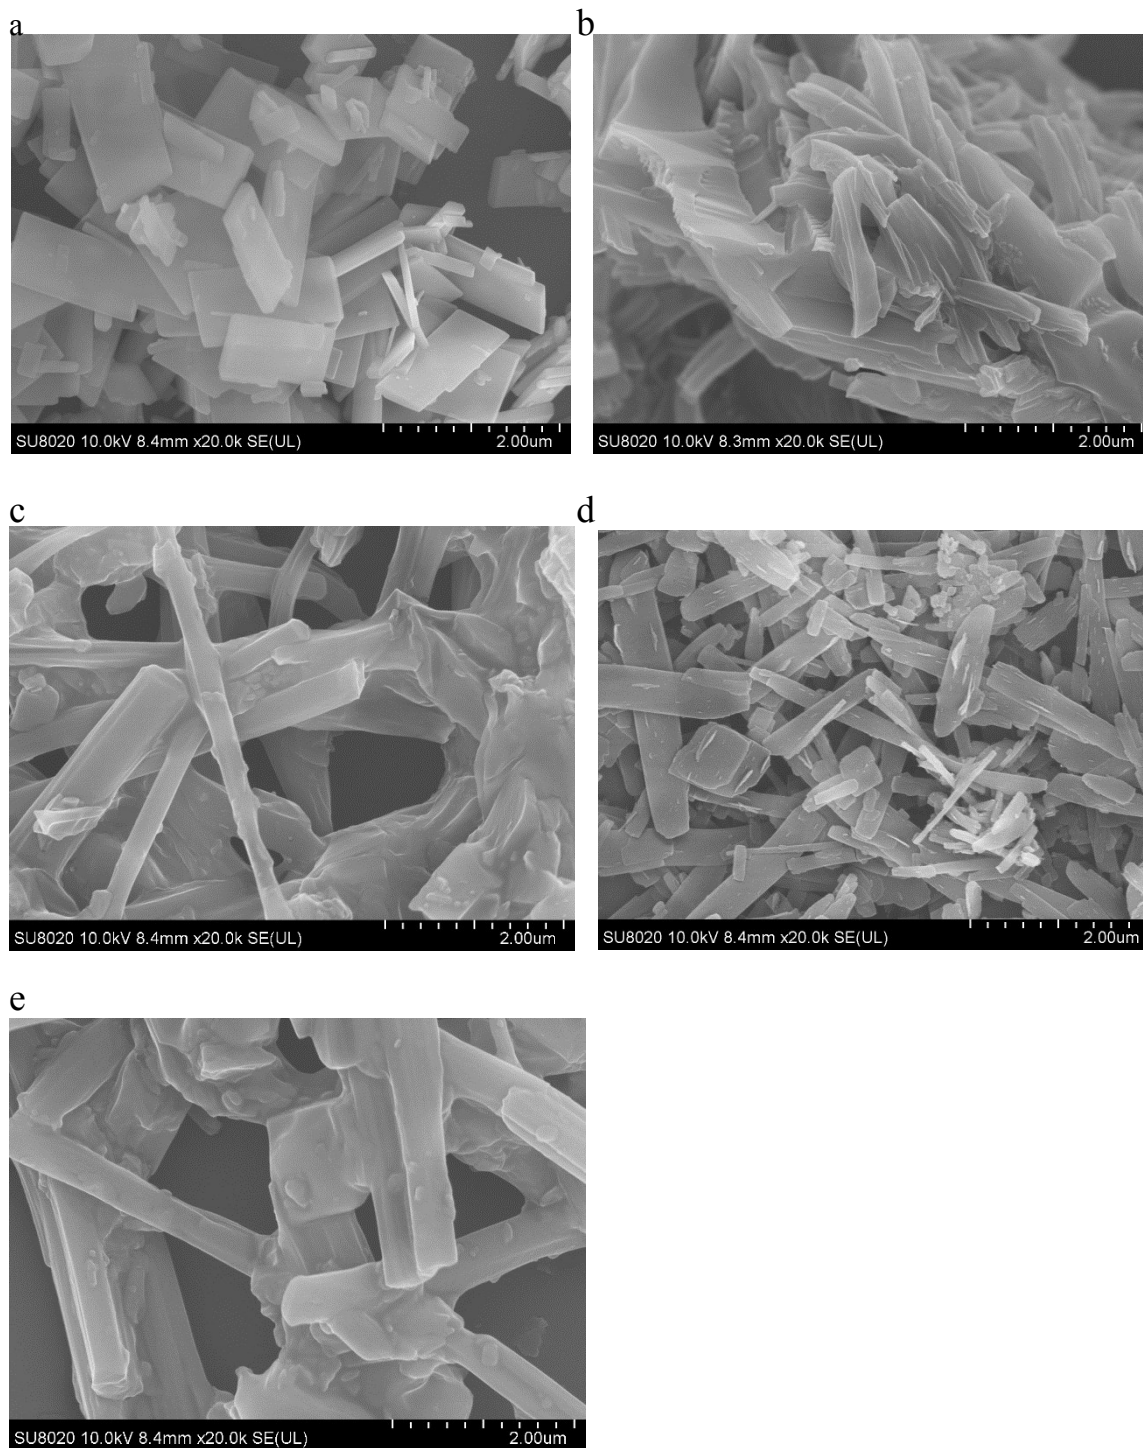

**Fig. S5** SEM photos of united hydrogen bonds products. **(a)** 1,3,5-Benzenetricarboxylic acid +  $K_2HPO_4$ ; **(b)** 1,4-Cyclohexanedicarboxylic acid +  $Na_2SO_3$ ; **(c)** 1,4-Cyclohexanedicarboxylic acid +  $K_2HPO_4$ ; **(d)** 1,3,5-Benzenetricarboxylic acid +  $Na_2SO_3$ ; **(e)** 1,4-Cyclohexanedicarboxylic acid +  $K_3PO_4$ .



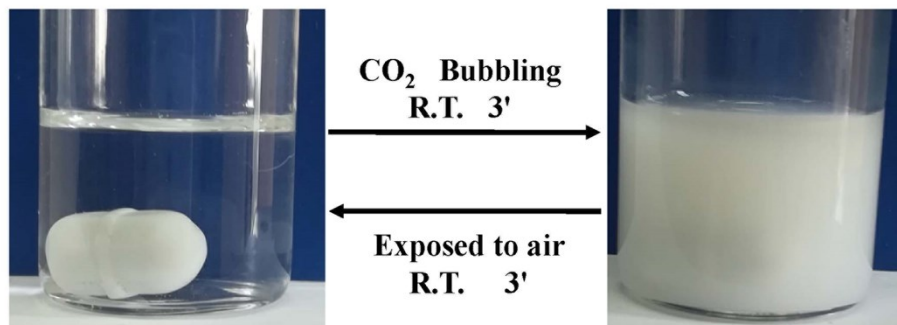

**Fig. S6.** Some surfactants separation from water.  
50 mg tributylhexadecylphosphonium bromide and 16 mg sodium 2-ethylhexanoate in  
5 g water.

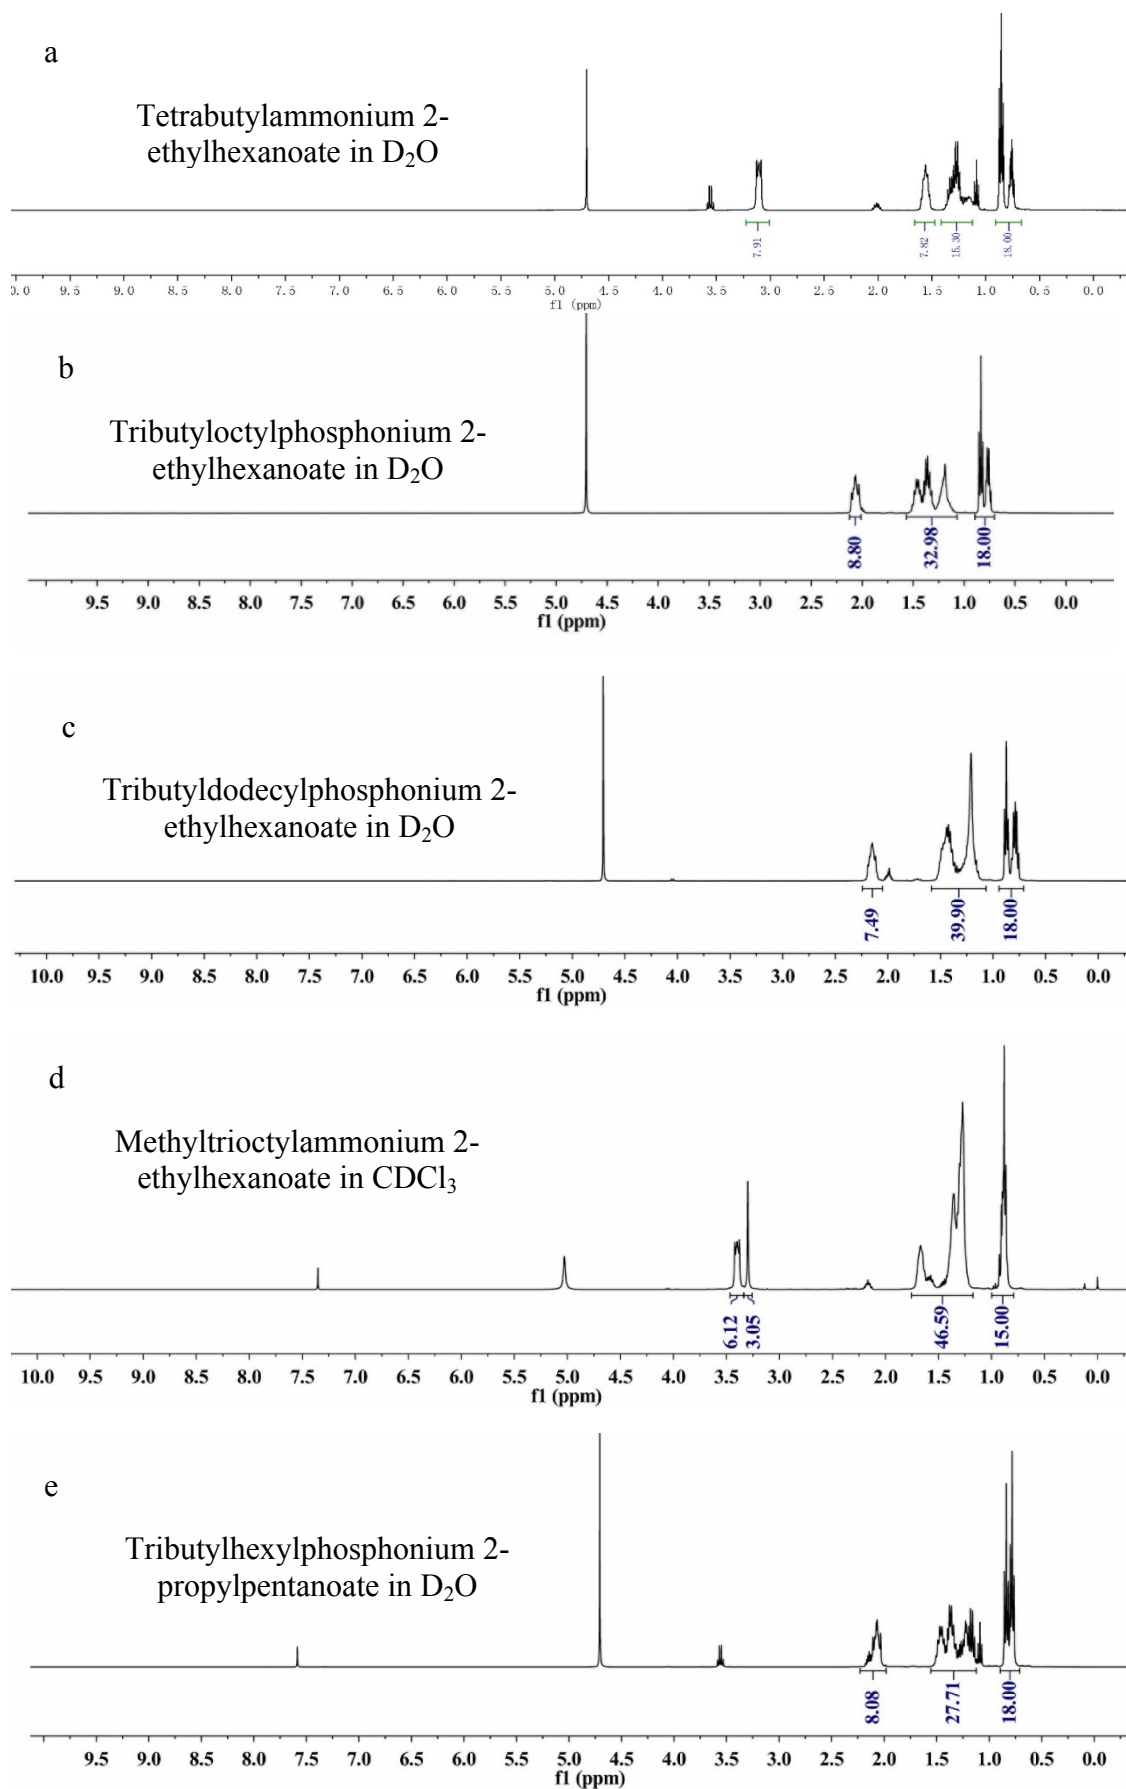

**Fig. S7** <sup>1</sup>H NMR of carboxylate ionic liquids.

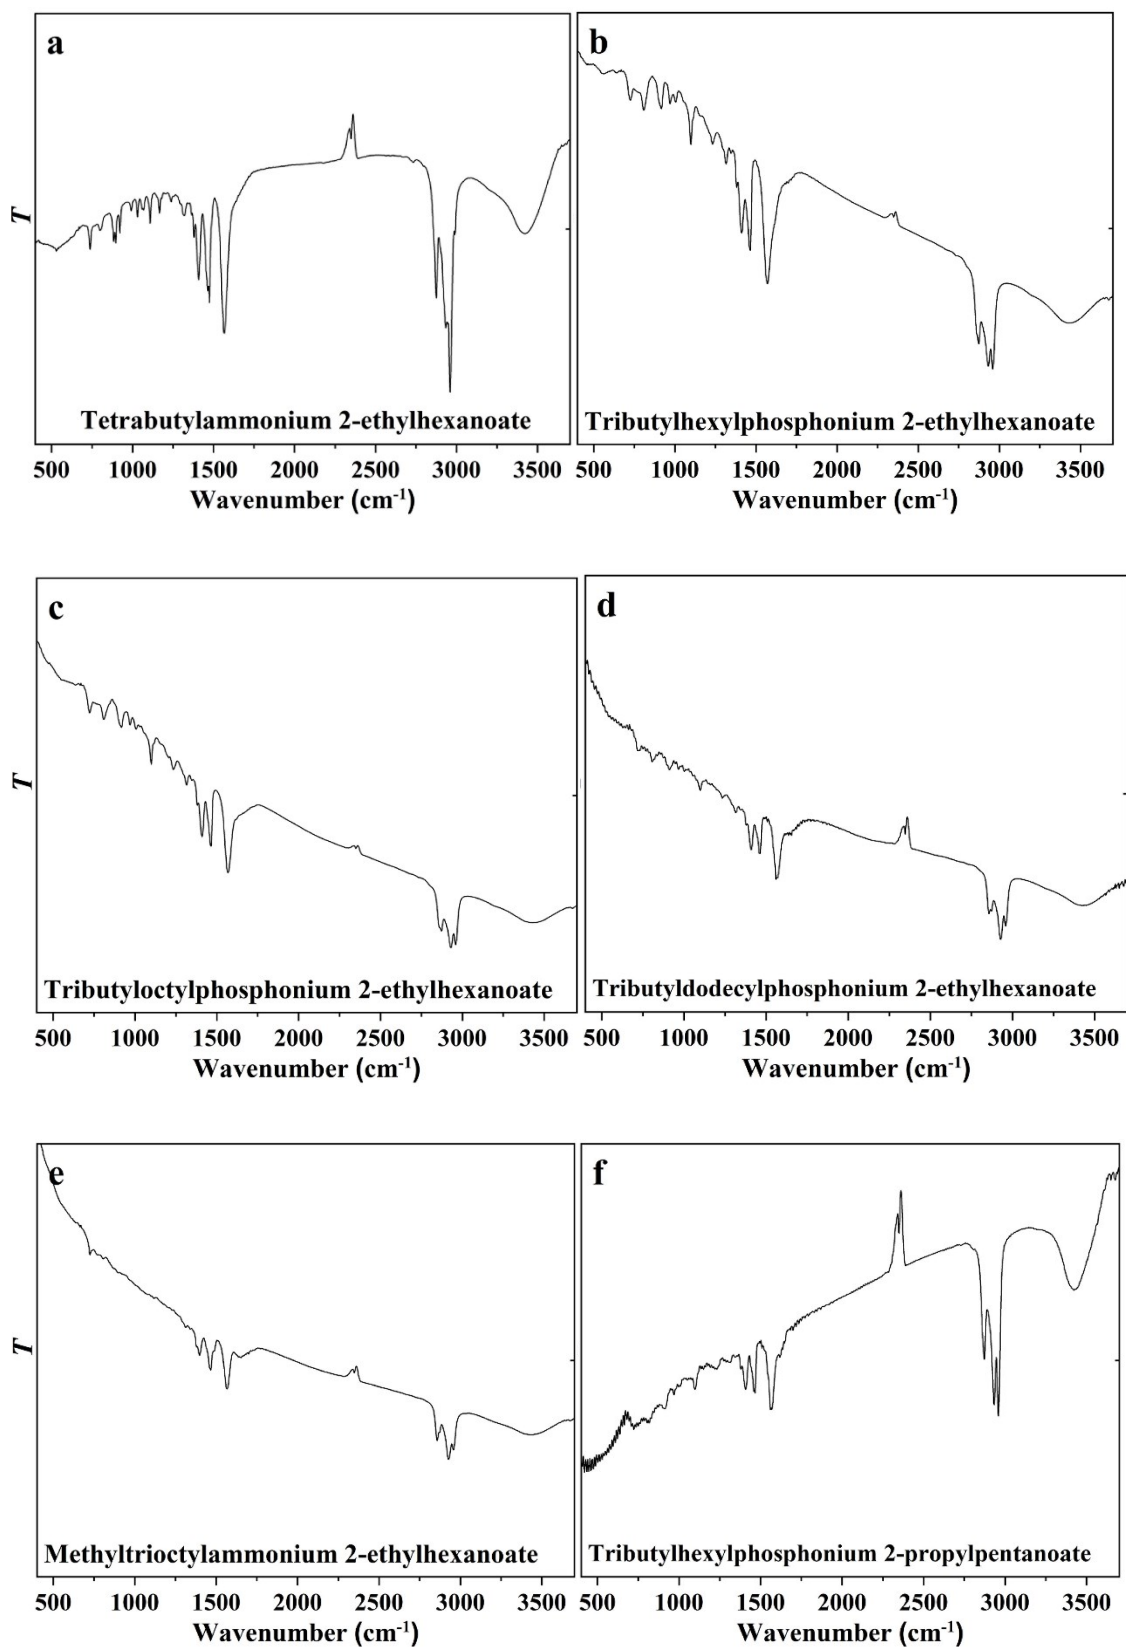

**Fig. S8** IR of carboxylate ionic liquids.
